# Supplementary material for: Network-based biomarkers enhance classical approaches to prognostic gene expression signatures
Source: PubMed Central journal article supplement (PMC4290694; doi:10.1186/1752-0509-8-s4-s5), 2014-12-08
Supplement: 1752-0509-8-S4-S5-S2.pdf [file 1752-0509-8-S4-S5-S2.pdf]

Randomly allocate the  $N$  patients into 5 subsets  $\mathcal{L}_1$ ,  $\mathcal{L}_2$ ,  $\mathcal{L}_3$ ,  $\mathcal{L}_4$  and  $\mathcal{L}_5$  of (approximately) equal size.

Select  $\mathcal{L}_1$  to be the **test set**, and the remaining four subsets  $\mathcal{L}_2$ ,  $\mathcal{L}_3$ ,  $\mathcal{L}_4$  and  $\mathcal{L}_5$  become the **training set**.

If required, perform **feature selection** (select  $m$  of the total  $M$  features) using each of the  $L$  patients in the **training set**.

|             | $P_{Train1}$ | $P_{Train2}$ | $\dots$ | $P_{TrainL}$ |
|-------------|--------------|--------------|---------|--------------|
| feature 1   | $v_{1,1}$    | $v_{1,2}$    | $\dots$ | $v_{1,L}$    |
| feature 2   | $v_{2,1}$    | $v_{2,2}$    | $\dots$ | $v_{2,L}$    |
| $\vdots$    | $\vdots$     | $\vdots$     |         | $\vdots$     |
| feature $M$ | $v_{M,1}$    | $v_{M,2}$    | $\dots$ | $v_{M,L}$    |

↓ some feature selection method ↓

selected features = [feature\* 1    feature\* 2    ...    feature\*  $m$ ]

**Build the classifier** (RF, SVM or DLDA) using the **training set**. That is, define a function  $\delta : \mathbb{R}^m \rightarrow \{PP, GP\}$ .

For each of the  $J$  patients in the **test set**, use the classification function  $\delta$  defined in the previous step to **predict** the class in which the patient belongs.

|              | $P_{Test1}$ | $P_{Test2}$ | $\dots$ | $P_{TestJ}$ |
|--------------|-------------|-------------|---------|-------------|
| feature* 1   | $v_{1,1}$   | $v_{1,2}$   | $\dots$ | $v_{1,J}$   |
| feature* 2   | $v_{2,1}$   | $v_{2,2}$   | $\dots$ | $v_{2,J}$   |
| $\vdots$     | $\vdots$    | $\vdots$    |         | $\vdots$    |
| feature* $m$ | $v_{m,1}$   | $v_{m,2}$   | $\dots$ | $v_{m,J}$   |

↓  $\delta$

$(\delta(v_{1,i}, v_{2,i}, \dots, v_{m,i}))_{i=1, \dots, J} = (PP, GP, \dots, GP)$

Determine the first **fold error** ( $FError_1$ ):

$$FError_1 = \frac{\text{\#patients in test set misclassified}}{J}$$

Repeat using all other **test/training set** combinations:

$[\mathcal{L}_2 | \mathcal{L}_1, \mathcal{L}_3, \mathcal{L}_4, \mathcal{L}_5]$ ,     $[\mathcal{L}_3 | \mathcal{L}_1, \mathcal{L}_2, \mathcal{L}_4, \mathcal{L}_5]$ ,  
 $[\mathcal{L}_4 | \mathcal{L}_1, \mathcal{L}_2, \mathcal{L}_3, \mathcal{L}_5]$ ,     $[\mathcal{L}_5 | \mathcal{L}_1, \mathcal{L}_2, \mathcal{L}_3, \mathcal{L}_4]$

to obtain a total of 5 fold errors.

The **cross validation error** is

$$CV \text{ error} = \frac{\sum_{i=1}^5 FError_i}{5}$$
